# Supplementary material
Source: Springer Nature journal article supplement (https://www.springermedizin.de/resource/supplementary/12967_2006_129_MOESM5_ESM.pdf/9575766)

CD62L

Day 14

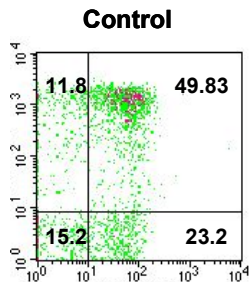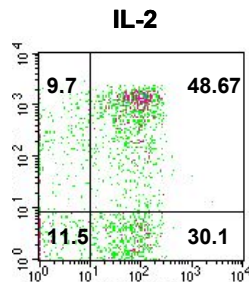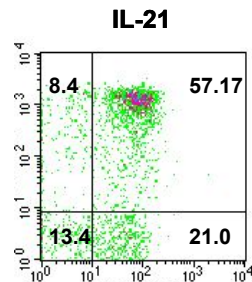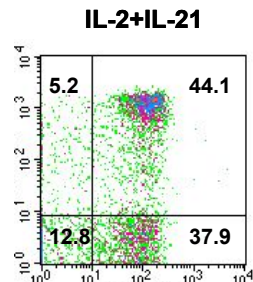

Day 21

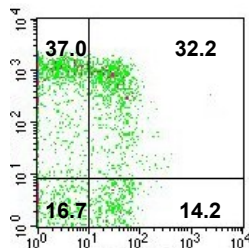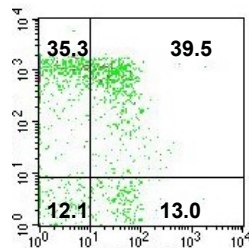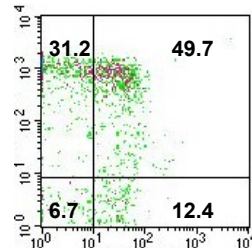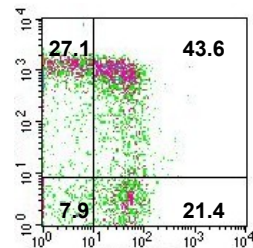

Day 28

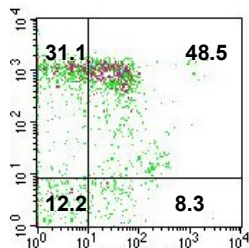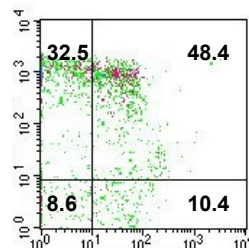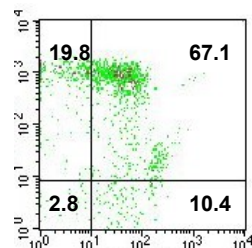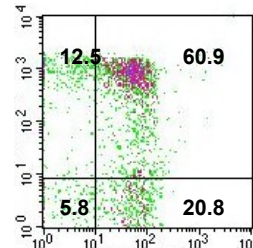

CD127

Supplement: MOESM5 [file 9575766]
